# Supplementary material
Source: PubMed Central journal article supplement (PMC545819)
Supplement: 7600533s1.pdf [file 7600533s1.pdf]

**Supplementary Fig. 1. cDNA sequence and deduced amino acid sequence of CrC3.** The cDNA sequence of CrC3 is shown with the translation embedded above the nucleotide sequence. The translation start and stop codons are boxed. There are two stop codons upstream and in frame with the translation start codon. The UTR functional element search was carried out in the UTRdb collections using UTRscan at <http://bighost.area.ba.cnr.it/BIG/UTRScan/>. The poly(A) signal, AATAAA in the 3'UTR is underlined and shaded. A Brd box (AGCTTTA at position 5734-5740 is shaded and double-underlined) in the 3'UTR and an internal ribosome entry site (IRES) in the 5'UTR (46-132) are found. The Brd Box negatively regulates gene expression, at both transcription and translation levels, but mainly represses translation. Cellular mRNAs containing IRES often encode regulatory proteins, whose expression is tightly regulated, and the current hypothesis is that IRES-mediated translation of certain mRNAs helps the cell to cope with transient stress (Vagner *et al*, 2001, *EMBO Rep* **2**: 893-898). The presence of Brd box and IRES indicates that the expression of CrC3 is tightly regulated in steady state, and may respond to an infection signal by boosting translation in a shifted mode of ribosome recruitment, instead of the usually stimulated transcription for other genes. We have indeed observed that the level of CrC3 transcript remains unchanged in response to bacteria infection. From our present analysis, we have observed that Brd box and IRES consistently occur in many other C3 sequences. The secretion leader peptide (1-21) predicted by SignalP V1.1 (Nielsen *et al*, 1997, *Prot Engineer* **10**: 1-6) at the <http://www.cbs.dtu.dk/services/SignalP>, is underlined. Peptide sequences of p34, p50 and p75, identified by MS-MS (see Fig. 1 and Table 1), are highlighted in the amino acid sequence of CrC3 (p75: yellow; p34: red; p50: cyan). The thioester motif GCGEQ and conserved catalytic His are boxed and shaded grey. The predicted  $\alpha/\beta$  joint process site RKKR, and potential  $\alpha/\gamma$  joint process sites (KRKER, RVKR) are double-underlined and highlighted in green.

1 AACGCAGAGGTTGCCCGAAAATATATTTAACGGAAAGGTTTATG TATTTTGTGCCAGCAGTACTTACTTCTGTAATCACTT GATTTTAGTTCAGTTTCT**FAA**GGTTATCG**AG**CTTAAATGTTGT

M E S R I L L F T L T V I F L C I R I E A ^ A N I F V A S P N T L R I G E Q

136 GAGTTCATCGATATCATTCCGAA**ATC**GAAAGTCGAATATTACTG TTTACGCTGACAGTCATTTCTGTGTATTCGGATGAAGGAGCA AACATCTTTGTGCTTCCGCCAACACATTGCGAATAGGTGAACAA  
E T I S V L L E G N K A E T V E V Y L Q D H P G K T K T F S K T V G R V E C P R I S T E F K  
271 GAAACTATCTCGGTACTTTAGAGGAAATAAAGCAGAGACTGTT GAAGTGTACCTCAGGATCATCCTGGAAAACAAAGACCTTCTCC AAACAGTGTGACCTGTTGAGCCAAAGATAGTACTGAATTCAAA  
V Q V N P E D L P D K D I L V A T A K H Y V S L V A K **AGN** W F H K **ETLLLVNFR** S G  
406 GTTCAAGTGAAACCAGAGACTTACAGATAAAGATATTCTAGTC GCAACTGCAAAACACTATGTGTCTTGTGGCAAAGCAGGAAAT TGGTTCATAGGAGACTTGTCTTGGTATATCCGAGACTCGA  
Y V F I Q T D K P I Y T P K Q T V H M R I I T L N E D L I P Q N K M I T L Q I K N P Q D I  
541 TACGTTTTTATCCAACTGATAAGCAATTTACTCCAAAGCAA ACAGTACACATCGCAATTTACTTTAAATGAAGATTTGATACCA CAAAATAAATGATTACTTTCGCAATTAAGACCCACAGGATATC  
T V E H H S W K V G K V G R R I E F Y T F D Y S F P P Y P L F G E W S A I V S Y G Y D L L  
676 ACAGTAGAGCATCATAGTTGGAAAGTGGAAAGTGGAAAGG ATAGAGTTTTATACATTTGATTATAGTTTTCCACCTATCCTCTC TTTGGTGAATGGTGCATTTTTCATATGGCTATGATTTGTTA  
Y N T T V K F E V K E Y V L P T F S V D V T A P E I I L E S T K K I I G S A H A K Y V Y G  
811 TATAATACAACGTGCAAGTTTGAAGTAAAGAATATGTTTTGCCA ACGTTTTCTGTGTATGTAACAGCTCCTGAAATATTTTAGAAGAT ACAAATAAATCATTGGAAAGTGCACATGTAAGTATGTTAGT  
E P V H G T A N F K F G V K **LNTGDI** I I I G T L Y N K Q L Q D G K V D Y Q I D V N E F  
946 GAACCTGTGATGGTACAGCAAAATTCAAATTTGGGGTGAAGT TAACACAGGAGACATTTATTTGGCACACTATAAATAGCAG CTTCAAGATGGTAAAGTGCATTAATCAATTTGATGTAAGT  
M K H G K I S G F P D L E G N H L F V E V S V L E Q A T G Q R E S G I N E N G I F T L S P  
1081 ATGAAGCTGGAATAATCAGGTTTCTGACTTGAAGGAAAC CATCTTTTGTGGAAGTCCGCTTGGAAACGGCCACAGGACAA CGAGAATCTGGAATAATGAAATGGCATCTTTACACTCTCTCTC  
Y D V S F T R C L N N F M P G Y T T L I P V D I N F V S G K P A P G I P A V I T V T D E K  
1216 TATGATGTGTCATTCAAGCGCTGCTCAATATTTACTGCTGGA TATACAACATTAATACAGTGGACATAAATTTGTTAGTGGTAAA CCAGCTCCAGGATTTCTGCTGTTATTTACTGTTACAGATGAGA  
G R A V V V Q K S E D T T S D E R G R C N F L V N P S K D L K E I K I E V K T N D G R G A Q  
1351 GGAAGAGCTGTTGTTCCAAAGTCAAGATCAAGTGAATGAA CGTGGCGTGTAACTTCTGTTAATCCAAGTAAAGACCTAAAA GAGATAAATAAGAGGTTAAACAATGATGGAAGAGGACCTAA  
Y Q R K G Q H R M G E Q S S E F G V G I A I D R G T T K K D L K V N E F S A S V L T N P  
1486 TACCAGAAAGAGTCAAGCAGAAATGGGTGAGCAGTCTTGA A TTTGGAGGATTTGGCATAAGACAGGACCAACTAAAGAAGT TTAAGAATCAATGAAGATTTTCAAGTCTTTGCAACACCA  
A G G I S L I S Y M V I S R G K I L I H K F L P K V E L I G H K I F F V N T D M S P S F  
1621 GCAGGTGGAATTTCTGATTTATATATGTAATTTCAAGGGG AAGATCCTAATCCATAAATTTCTCCAAAAGTGAATTAATAGT CATAAATCTTCTGCTAGTCAATACAGATATGTCACCTAGCTT  
R L V Y A V Y K G H L L T D S I L Y N V E P T C K E S V K F K L E T D V I D R P K P G Q  
1756 CGACTAGTTCATGCTGTACAAAGGGCCTGACTGAC TCCATCCGTTATAGTGAACCTATGTAAGAAAGTGTAAAG TTTAAACTGAAACAGATGTAATAGATCGTCCAAAGCTGGACAA  
L V K **INIVEAT** K D T K **IGLLAVDEAVYILR** N K D R L T R E K M F Q E M E K H  
1891 CTTGTAATAAATTAATTTGTTGAGGCCAATAAGATACAAAAAT GGATTTAGCTGTTGATGAAGCTGTTTATATCTTCGTAACAAA GACAGATGACTAGAAAAAATGTTCCAAGAAATGGAAAGCAT  
D L G C G P G G G S N I Q S V L A N A G A V A I L S T T L T N Y K R E D D Y I C A V R I **R**  
2026 GACTTAGGATGTGGACTGGAGGAGTACTAATATACAGATGTG TTAGCCATGCTGAGTGTGCAATTTCTCTAGTACAACACTACC AACTACAACCTGAAGATTTATTTGTCGCTGCTGTTCCGAAA  
**KL** **ELMEELV** K Y E K R D K Q C C I L G M K H D P D Q R S C E E R H A I F E K Y D  
2161 AAGCGAGAATAATGGAAGAAATAGTCAAAAGTATGAGAAAAG GACAACACAGTCTGTATACTTGGCATGAACACTGATCCAGCAGC CGAAGCTGTGAAGAAAGCATGCTATTTTGAATAATGACTTT  
D G K E T C M A A F L G C C N E K **RLYLELR** N I E K E G R G R F G F D P A D Q L I T V G  
2296 GATGGGAAGAACTGTATGGCAGACTTTTAGGATGCTGCAAC GAAAAGCATTTGATTTACTTAAATAATTTGAGAAGGAAAGCCGT GGTAGGTTTGGTTTGTCCAGCTGATCAACTAATTTACTGTTGG  
L E E E Q E L L K Q L N V R K D F R **ETWIFDDVYVGF** K G R V E K E L S L P H S I T  
2431 TTAGAAGGAAACAAGACTTCTGAAACAATAAATTTAGGAAA GACTTTAGGGAATTTGATGATTTGATTTGTTGTTGCTCT AAGGAAAGGTAGAAAAGAAATTTACTACCACATGACATAACC  
T W V V Q A V G I S N T G G M C I A E A E P L K I I T T F K S I F V Q L N I P Y S V R N E Q V  
2566 ACATGGGTAGTCAAGCTTGGAACTCCAATACAGGAGGATG TGTATAGCTGAACCTTGAAGATTTACTCTTCAAAGCATTTT GTCAGCTCAATTTCCATTTTCAAGTGTCCAGGATGAACAAGT  
E I Q A T V F N N H A H Q Q S V R A S V A Y M Y G K G L C S G A E E G A Q R T E R K V D I G  
2701 GAAATCAAGCACTGTTTCAACAATCATGCCACAGCTGCTG AAGCTTCAGTGTATATGTTGTGTGAAAGGCTTGTCTCGGA GCTGAGGAAGGTCAAGAGCAACCGGAAAGTCTGGATTTGGA  
R S S A K **SVSFPVVP** L R **VGEFFV** V V V F T V H G S D F I E K K **NVVPEG** A  
2836 CGAAGTTCAGAAAATCTGCTGACTTCCCTGTTGACCTCTGAAA GTGGCGCAATTTCTGTTAGGTTTGGTCTTCACTGTTCAATGGA AGTGAATTTTATGAGAAAATGAAATGAAATGAAAGGAGCT  
**D** S K **LISLQLDLP** N Q Q K R Q K R S I H E K Y Y I D S I D P E K K M Q I S I V L E  
2971 AAGGCTCAAACTTATCTACTGAGCTAGACTCCACTAATCAA CAGAAAAGCAGAAAAGAGCCTCCATGAAAGTACTACTGAT TCCATAGATCCTGAAAAGAAAGTGCAGATCTCAATTTGTTGAGGCTG  
Q P P P N Y V P D T A K **CLVSVIADR** **FGFVVE** T A L E N T E K L I Q H P R **SCGB**

3106 CAGCCACCATTATGTTCCAGACACAGTAAATGTTTGTGTT CAGTTATTTGCTGATCGATTCGGCCAGTGTGTGAAACAGATTA GAAAATACTGAAAACCTCATTCAACCCCCCGTGTGGAGAA  
**D** T M L F M A P T L T V K Y L K V T G Q L N N A N T E K N G Y K F I A R D G Y S R E T T L F R  
3241 CAGACAACTGTTTATGACCTACTTGTATCTGTGAAGTAT TGAAGGTCCTGCTGCTTAAATGCAAAATACAGAAAAGATGGA TACAAGTTTATAAGAGATGTTTATAGTAGAGACTTACTCTCAGA  
K N D G S Y A A W Q N R P S T T W L T A F V M R V F C Q A Q K **LIEIDEK** V I C S G M Q  
3376 AAAAAATGATGATCATATGCGCATGCCAAATAGACCTTCAAG CACTGGTTAACAGCCTTTGTGATGAGAGTGTCTGTCCAGGCACA AAGCTAATTGAAATTTGATGAGAAGTGATATGATGTTGATGCAA  
W L V Q R Q K P D G S F V D E K P V I **H** Q E M I G G V K G A L P M T A F V L M A L H E C S  
3511 TGGCTTGTGAGAGACAGAAACAGTTCATTTGTAGATGAA AAACCTGCTATTCATCAGGAAATGATTTGGTGTGCAAGGGAGCA TTACCAATGACAGCTTTGTACTGATGCTTTCATAGTGTTC  
C T T V P G L K L A K I R **AAAYLEIK** V P H I Q D P Y I M S L V A Y S L S L A G N N A  
3646 GTTACCAGTTCCAGGATTAATACTTGAATAAATCCGTGCA GATATCTTGGAAATTAAGTTTCCGATATCCAGGACCCATACATT ATGCTATTAGTTCGATTTCCCTGCTTTAGCTGGTAAATGCC  
K V E A N R K **LLSMATFQ** **ADK** N Y H Y W G D P N S P R A I E T A G Y G L V Q I L N  
3781 AAGGTGGAAGCAATCGAAATCTTCTATGCAACCTTTGAG CGACAGAAAACACTACCTACTGGGAGACCCCAACAGCTCCCGA GCCATTGAGACTGCTGGATATGGAATCTGGTTCAAATATAAAC  
N D I E Y A N S I V N L N S K R T L S G A F K S T Q D T V I A L Y A C T T S E Y S I L A K K  
3916 AATGATTTGAAATGCTAACAGTTTGAACTGCTGAATTC AAGAAACATTTCTGTGCAATCAAGTCCACAGATACAGTT ATCGTCTTATAGCTTTTGCAGAAATACAGTATCTGGCAAGAA  
P E T D L Q C N V T L N D P S F F A E L H F K E S T A N I L Q Q F Q I S N L G H L I F  
4051 CTTGAAACAGTTCGAGTGAATGTCACATGAAACAATGACCT TCTTTCTCAAAGACTTCATTTCAAAGAGGACCTGCTAATAT CTCCAACAGTTTTCAGATTTCAAATCTAGGAGGACACTTCTCT  
N T T G Y G M G Q L A V E L K Y **NVPEVPEK** L C K F D I D V K V N E V K **E E I Q Q V I**  
4186 AATACAACAGTATGAAATGGCCAGTGTGTTGAAATGAA TACAACGTTCTGTGCCCCAGAAAAGCTTGAAGTGTGATTT A L R N L N G F P **RLKPR** S L S D N I Q D Y A **RVKRD** N  
4321 GATCCAAAGTCCCTGGAATGATGTTTGTGTTGCTGAT GCATTACTCCGAAATTTAGTTCCTCCAAAAGAAAAGAGATCA CATTCTGACAACTCAAGACTATGCAAGAGTTAAACGAGATAAC  
R G R V G D G G R R G N D G K S K L L L E I Q I C V K Y L S H V D S N M A I I E A G I F T  
4456 AGAGGTCAGTTGGAGTGGAGGAGAGCTGTAATGATGGAA GCAAACTATTGTTGGAATCCAAATATGTTGTAATATTTGCT CATGTAGATCTAATAGGCAATTTGAAGCTGGAATATTACT  
G F K V L I D E L K Q L V K E K N S K I A R F E A S D K S V V F Y M D S A P H D K P Y C F  
4591 GGTTCCAAAGTTTAAATAGATGAATTAACAGCTGGTGAAGAG AAGAAATCCAGATTTGCAAGATTTGAAGCATGACAAAAGTGT GTATTTTACATGATAGGCTCCCATGATAAACCCTTACTGTTT  
K F R T V R Q F F I V G N I Q S S V V K A Y Y D Y K K P N E S C S Q F Y S P D N Q S P L I R T  
4726 AAGTCCGAAGTACAGACTTCAATGTTGGTAAACATCAATC AGTGTGTCAAAGTTTATGATTACTACAACCAATGAATCATGC TCCCAGTTTATAGTCCAGACACCAAGCTTCTTAAATCGAAC  
I C E G S V C Q C A E G G C P P R H R F Q G V T Q I H D I S E S R K L L C L D R A C V D H D  
4861 ATCTGTGAAGGAGTGTATGCGAGTGTGCAAGTGGCTGCT Y V W K G T V E S K R K E N G F R A Y I S F R V T S V F K E G I E Q K Q N I L H T S I K D L M  
4996 TATGTGGAAAGTACTGTTGAAAGAAAAGAAAAGTGA TTTTCGTATATTTCAAGTCAAGTCAAGTCTTAAAGAAAGT ATTGACAAAACAAAATATTCGATACATCAAGATCTGATG  
V R D S C S V A D L D I Q Q E Y I V M G R D G A Q F K D E D T G I L L Y R Y I L D Q S T S  
5131 GTACAGACTGCTGTTGATGATTTAGATACAGCAAGAA TATGTTATTTAGGAGCTGATGAGCCAGCTTAAAGATGAGGAT TACTAGTATGTGCTAGATGTTTCAAATGAACCTTCTTATTAT  
I F K W T R I S V A E N K G L T K A F R W L E K H M V M G E G C P Q \*  
5266 ATATTTAAATGGACAAGGATATCAGTGGCAGAAAATAACAATG ACAAAGCATCCCTGGCTTGAAAAACACATGGTTATGGAGAA GGAGGCTGTCGCCAG**FAA**ATTTTGAAGGTTGTTTTCTATTGT

5401 TTTTCATTGTAATATTGTAATTTCAAGCAGTGTTCCTC TTTGCAAGAATCTTGTGTTAATGGCAAAAATTTTACAATA AGATTGTTCAATATTAGAATCAGTGACAACCTGGATATATGTT  
5536 AAATGTTAAATATTGACATTTGCAATATTTTGTCTGTAG CCATCATTTCAATACATACATCTTATCCAGCAGTTTTAAACT TACTTTTAAAGAAATATCAGTAAACACTAATATATTTAATGACA  
5671 TAGTGTATCTTTAATTTATAAAGCTCAAAAACCTCATTTACT TCTTCAATCAATATG**AGCTTTA**TAATCATATTTTGGCTGAATA **AA**TCACTATGTAATTTGTTAAAGTTATTAACTAAATGGCCTT  
5806 ATATACAATGCAAGAAATATCAATGTCGGGTAATATTTGT ACAATATTTACTACAGAGCCAGTTTGTATTAACCTTTAGTAACT TACTAGTATGTGCTAGATGTTTCAAATGAACCTTCTTATTAT  
5941 TTATGATTTAGTTGGTCCAGGATTTGAAATGCTCTGCATACATA TTTCTGTGAGGTTTGTATCAAGTGTGACAGACATTAAG GAGTCTTCCCAAAAAAAAAAAAAAAAAAAAAAAAAA

Supplementary Fig. 1
