# Supplementary material
Source: PubMed Central journal article supplement (PMC545819)
Supplement: 7600533s4.pdf [file 7600533s4.pdf]

**Supplementary Fig. 4. cDNA sequence and deduced amino acid sequence of CrC2/Bf.** The sequence was obtained from three overlapping cDNA clones. The signal peptide is shaded grey. Serine protease active sites are indicated in yellow boxes. Domain arrangements were predicted using GlobPlot server (<http://globplot.embl.de>), and are labeled accordingly (CCP, complement control protein domains, highlighted in yellow; VWF, von Willebrand factor type A domain, highlighted in green; Tryp\_Sp, Serine protease domain, highlighted in cyan). The predicted catalytic triad sites for serine protease activity are shown in boxes, and the predicted Factor D cleavage site is annotated by an upward arrow.
