# Supplementary material
Source: PubMed Central journal article supplement (PMC545819)
Supplement: 7600533s6.pdf [file 7600533s6.pdf]

**Supplementary Table 1.** The sequences used for the multiple sequence alignment and phylogenetic analysis of the thioester protein family including CrC3.

| <b>Code name</b> | <b>Name</b>                        | <b>Accession number</b> | <b>Organism</b>                      |
|------------------|------------------------------------|-------------------------|--------------------------------------|
| aTEP             | <i>Anopheles</i> TEP-I             | AF291654                | <i>Anopheles gambiae</i>             |
| dTEPI            | <i>Drosophila</i> TEP1             | CAB87807                | <i>Drosophila melanogaster</i>       |
| dTEPII           | <i>Drosophila</i> TEP2             | CAB87808                | <i>Drosophila melanogaster</i>       |
| dTEPIII          | <i>Drosophila</i> TEP3             | CAB87809                | <i>Drosophila melanogaster</i>       |
| dTEPIV           | <i>Drosophila</i> TEP4             | CAB87810                | <i>Drosophila melanogaster</i>       |
| cTEP             | <i>Caenorhabditis</i> TEP2         | T27829                  | <i>Caenorhabditis elegans</i>        |
| SeC3             | Cnidaria C3-like protein           | AAN86548                | <i>Swiftia exserta</i>               |
| BbC3             | Amphioxus C3                       | BAB47146                | <i>Branchiostoma belcheri</i>        |
| SpC3             | Sea urchin C3                      | AF025526                | <i>Strongylocentrotus purpuratus</i> |
| CrC3             | Horseshoe crab C3                  | AF517564                | <i>Carcinoscorpius rotundicauda</i>  |
| HrC3             | <i>Halocynthia</i> (Ascidian) C3   | AB006964                | <i>Halocynthia rorezi</i>            |
| CiC3             | <i>Ciona</i> (Ascidian) C3         | CAC85959                | <i>Ciona intestinalis</i>            |
| HaC3             | Hagfish C3                         | Z11595                  | <i>Eptatretus burgeri</i>            |
| LaC3             | Lamprey C3                         | Q00685                  | <i>Entosphenus japonicus</i>         |
| TrC3             | Trout C3                           | I51339                  | <i>Oncorhynchus mykiss</i>           |
| CaC3             | Carp C3-H1                         | AB016210                | <i>Cyprinus carpio</i>               |
| XeC3             | Xenopus C3                         | AAB60608                | <i>Xenopus laevis</i>                |
| ChC3             | Chicken C3                         | I50711                  | <i>Gallus gallus</i>                 |
| CoC3             | Cobra C3                           | Q01833                  | <i>Naja naja</i>                     |
| CVF              | Cobra Venom Factor                 | I51018                  | <i>Naja naja</i>                     |
| HuC3             | Human C3                           | P01024                  | <i>Homo sapiens</i>                  |
| GpC3             | Guinea Pig C3                      | P12387                  | <i>Cavia porcellus</i>               |
| RaC3             | Rat C3                             | X52477                  | <i>Rattus norvegicus</i>             |
| MoC3             | Mouse C3                           | P01027                  | <i>Mus musculus</i>                  |
| CaC4             | Bony fish (Carp) C4                | BAB03284                | <i>Cyprinus carpio</i>               |
| ShC4             | Shark C4                           | BAC82347                | <i>Triakis scyllium</i>              |
| ChC4             | Chicken C4                         | T28153                  | <i>Gallus gallus</i>                 |
| XeC4             | Xenopus C4                         | D78003                  | <i>Xenopus laevi</i>                 |
| MoC4             | Mouse C4                           | P01029                  | <i>Mus musculus</i>                  |
| MoSPL            | Mouse Sex Limited Protein          | M21576                  | <i>Mus musculus</i>                  |
| HuC4A            | Human C4A                          | K02403                  | <i>Homo sapiens</i>                  |
| HuC4B            | Human C4B                          | U24578                  | <i>Homo sapiens</i>                  |
| CaC5             | Bony fish (Carp) C5                | BAC23058                | <i>Cyprinus carpio</i>               |
| MoC5             | Mouse C5                           | P06684                  | <i>Mus musculus</i>                  |
| HuC5             | Human C5                           | P01031                  | <i>Homo sapiens</i>                  |
| LiA2M            | Horseshoe crab alfa2-macroglobulin | D83196                  | <i>Limulus polyphemus</i>            |

|       |                                |          |                             |
|-------|--------------------------------|----------|-----------------------------|
| LaA2M | Lamprey alfa2-macroglobulin    | D13567   | <i>Entosphenus japonicu</i> |
| ChOvo | Chicken Ovostatin              | P20740   | <i>Gallus gallus</i>        |
| RaA1I | Rat alfa1-inhibitor            | P14046   | <i>Rattus norvegicus</i>    |
| HuPZP | Human Pregnancy Zone Protein   | X54380   | <i>Homo sapiens</i>         |
| GpA2M | Guinea pig alfa2-macroglobulin | JC5143   | <i>Cavia porcellus</i>      |
| HuA2M | Human alfa2-macroglobulin      | P01023   | <i>Homo sapiens</i>         |
| RaA2M | Rat alfa2-macroglobulin        | P06238   | <i>Rattus norvegicus</i>    |
| RaA1M | Rat alfa1-macroglobulin        | M77183   | <i>Rattus norvegicus</i>    |
| MoA2M | Mouse alfa2-macroglobulin      | Q61838   | <i>Mus musculus</i>         |
| CiTEP | <i>Ciona</i> (Ascidian) TEP    | CAD24311 | <i>Ciona intestinalis</i>   |
| OmA2M | Soft Tick alfa2-macroglobulin  | AAN10129 | <i>Ornithodoros moubata</i> |
